# Supplementary material
Source: PubMed Central journal article supplement (PMC7716899)
Supplement: 41999_2020_396_MOESM1_ESM.pdf [file 41999_2020_396_MOESM1_ESM.pdf]

Article Title: Can probiotics, prebiotics and synbiotics improve functional outcomes for older people: a systematic review

Journal Name: European Geriatric Medicine

Names of authors: Coutts L, Ibrahim K, Tan QY, Lim SER, Cox NJ and Roberts HC

Affiliation and addresses of authors: Academic Geriatric Medicine, University of Southampton, Southampton General Hospital mailpoint 807, Southampton, SO16 6YD, UK

E-mail address of corresponding author: [l.coutts@soton.ac.uk](mailto:l.coutts@soton.ac.uk)

# Appendix 1: Search Strategy

## HDAS Systematic Review Search:

- Medline
- EMBASE
- CINAHL
- Pubmed

- |                                                                                                                                       |
|---------------------------------------------------------------------------------------------------------------------------------------|
| <ul style="list-style-type: none"><li>• All- title and abstract</li><li>• Limits: Year of publication- no earlier than 2000</li></ul> |
|---------------------------------------------------------------------------------------------------------------------------------------|

## Spine search terms:

1. Older\*
2. Elder\*
3. Aged
4. Geriatric
5. Dementia
6. Dementia thesaurus
7. "Parkinson's Disease"
8. 1 OR 2 OR 3 OR 4 OR 6 OR 7
9. Prebiotic\*
10. Prebiotic in thesaurus
11. Probiotic\*
12. Probiotic in thesaurus
13. Synbiotic\*
14. Synbiotic in thesaurus
15. 9 OR 10 OR 11 OR 12 OR 13 OR 14

## Physical function:

16. Fall\*
17. Fall thesaurus
18. "Activities of Daily Living"
19. ADL thesaurus
20. Strength
21. Strength thesaurus
22. Physical ADJ2 Function
23. 1 OR 2 OR 3 OR 4 OR 5 OR 6 OR 7

## Frailty:

24. Frail\*

## Mood and Cognition:

25. Cogniti\*
26. Cognition thesaurus
27. Mood
28. Mood thesaurus
29. Depress\*
30. Depression thesaurus
31. 1 OR 2 OR 3 OR 4 OR 5 OR 6

## Mortality:

32. Mortality
33. Death

34. 32 OR 33

Receipt of care- hospital admissions or length of stay

35. Hospital ADJ2 Admission\*

36. "Length of stay"

37. 35 OR 26

Final result:

38. 23 OR 24 OR 31 OR 34 OR 37

39. 8 AND 15 AND 38 [2000 – 2020]
